# Supplementary material for: ЧИСЛЕННОЕ МОДЕЛИРОВАНИЕ ИСТЕЧЕНИЯ ГАЗА ИЗ ПОРИСТОЙ СРЕДЫ
Source: MDPI journal article supplement (doi:10.3390/ijms23020965), 2009-01-01
Supplement: s1 [file s1]

## Solvent- and Light-Sensitive AIEE-Active Azo Dye: From Spherical to 1D and 2D Assemblies

Mina Han, Ikue Abe, Jihun Oh, Jaehoon Jung, Young Ji Son, Jaegeun Noh, Mitsuo Hara and  
Takahiro Seki

### Contents

**Figure S1.** TGA curve of 3Bu under nitrogen atmosphere.

**Figure S2.** UV-vis absorption spectral changes of 3Bu in toluene-DMF mixtures (20  $\mu$ M) with different volume ratios.

**Figure S3.** (a) OM and corresponding (b) FOM ( $\lambda_{\text{ex}} = 520\text{--}550$  nm) images of 1D structures obtained from toluene-MeOH mixture (1:4, v/v, 20  $\mu$ M).

**Figure S4.** SEM images showing the morphological growth processes of 3Bu THF-H<sub>2</sub>O (1/1, v/v, 25  $\mu$ M) mixtures according to storage time at 10-15°C.

**Figure S5.** OM images taken (a) before and (b) after exposure of a fiber sample to THF vapor for 8 hours.

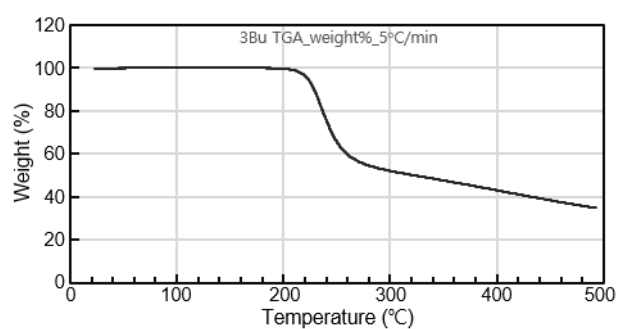

**Figure S1.** TGA curve of 3Bu under nitrogen atmosphere.

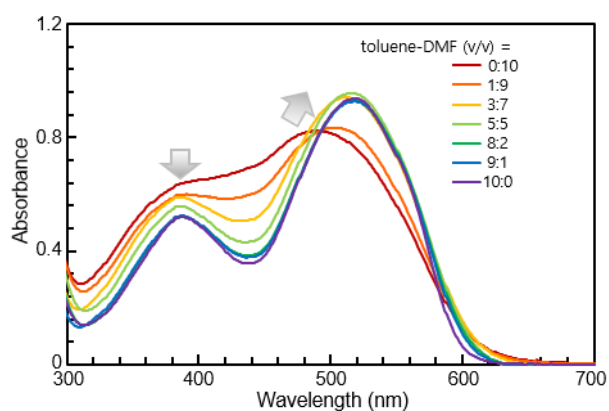

**Figure S2.** UV-vis absorption spectral changes of 3Bu in toluene-DMF mixtures (20  $\mu\text{M}$ ) with different volume ratios.

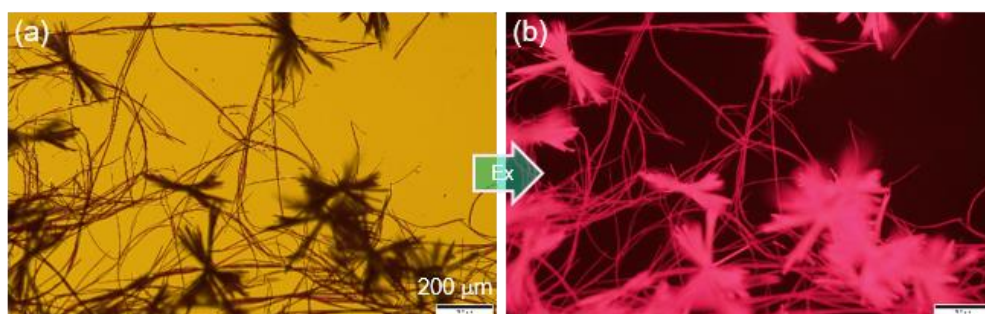

**Figure S3.** (a) OM and corresponding (b) FOM ( $\lambda_{\text{ex}} = 520\text{--}550\text{ nm}$ ) images of 1D structures obtained from toluene-MeOH mixture (1:4, v/v, 20  $\mu\text{M}$ ).

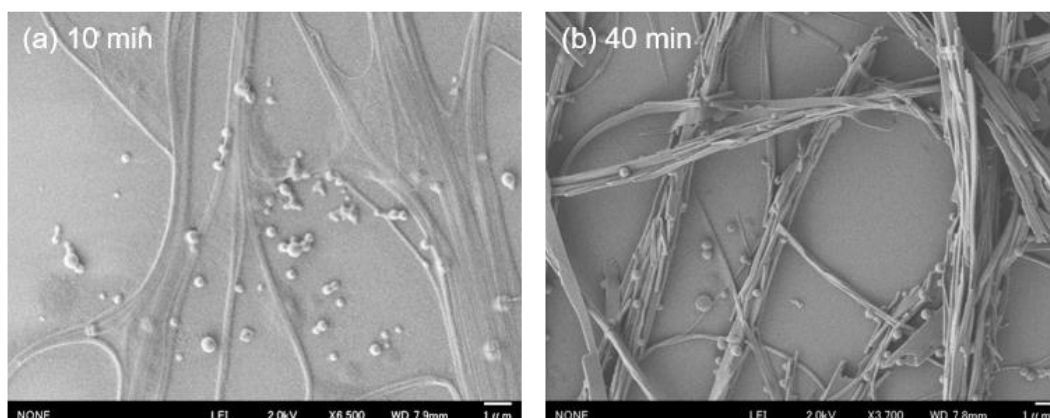

**Figure S4.** SEM images showing the morphological growth processes of 3Bu THF-H<sub>2</sub>O (1/1, v/v, 25 μM) mixtures according to storage time at 10-15°C.

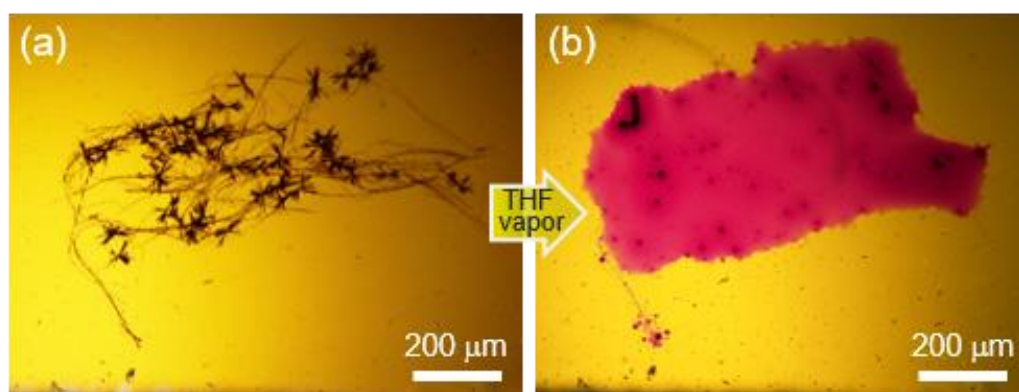

**Figure S5.** OM images taken (a) before and (b) after exposure of a fiber sample to THF vapor for 8 hours.
